# Supplementary material
Source: PubMed Central journal article supplement (PMC3668459)

# Entropy from State Probabilities: Hydration Entropy of Cations

Roland G. Huber<sup>1</sup>, Julian E. Fuchs<sup>1</sup>, Susanne von Grafenstein<sup>1</sup>, Monika Laner<sup>1,†</sup>, Hannes G. Wallnoefer<sup>1,‡</sup>, Nejma Abdelkader<sup>2</sup>, Romano T. Kroemer<sup>2</sup>, Klaus R. Liedl<sup>1\*</sup>

<sup>1</sup> Department of Theoretical Chemistry, Faculty for Chemistry and Pharmacy, Center for Molecular Biosciences Innsbruck (CMBI), Leopold-Franzens University Innsbruck, Innrain 80/82, A-6020 Innsbruck, Austria

<sup>2</sup> CRVA, Sanofi-Aventis, 13 Quai Jules Guesde, F-94403 Vitry-sur-Seine, France

## 1. Radial Distribution Functions

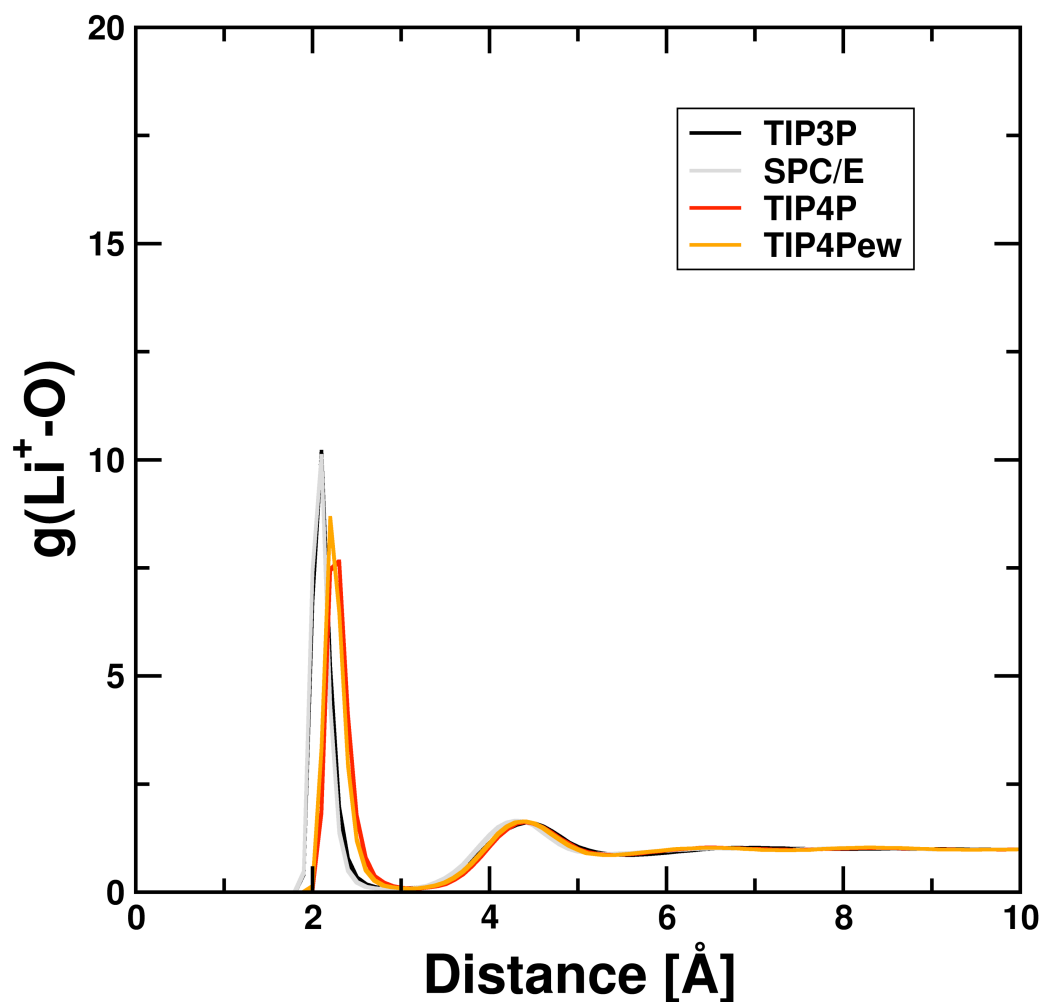

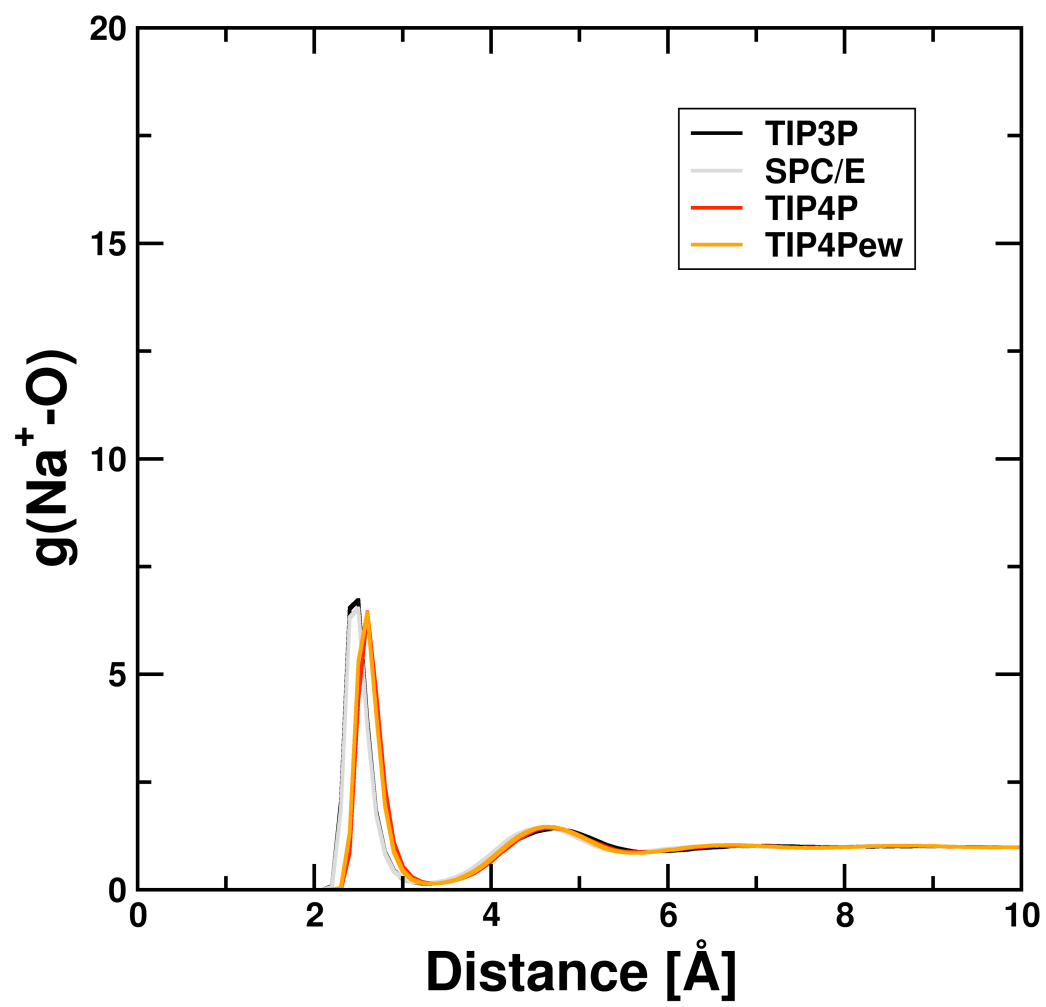

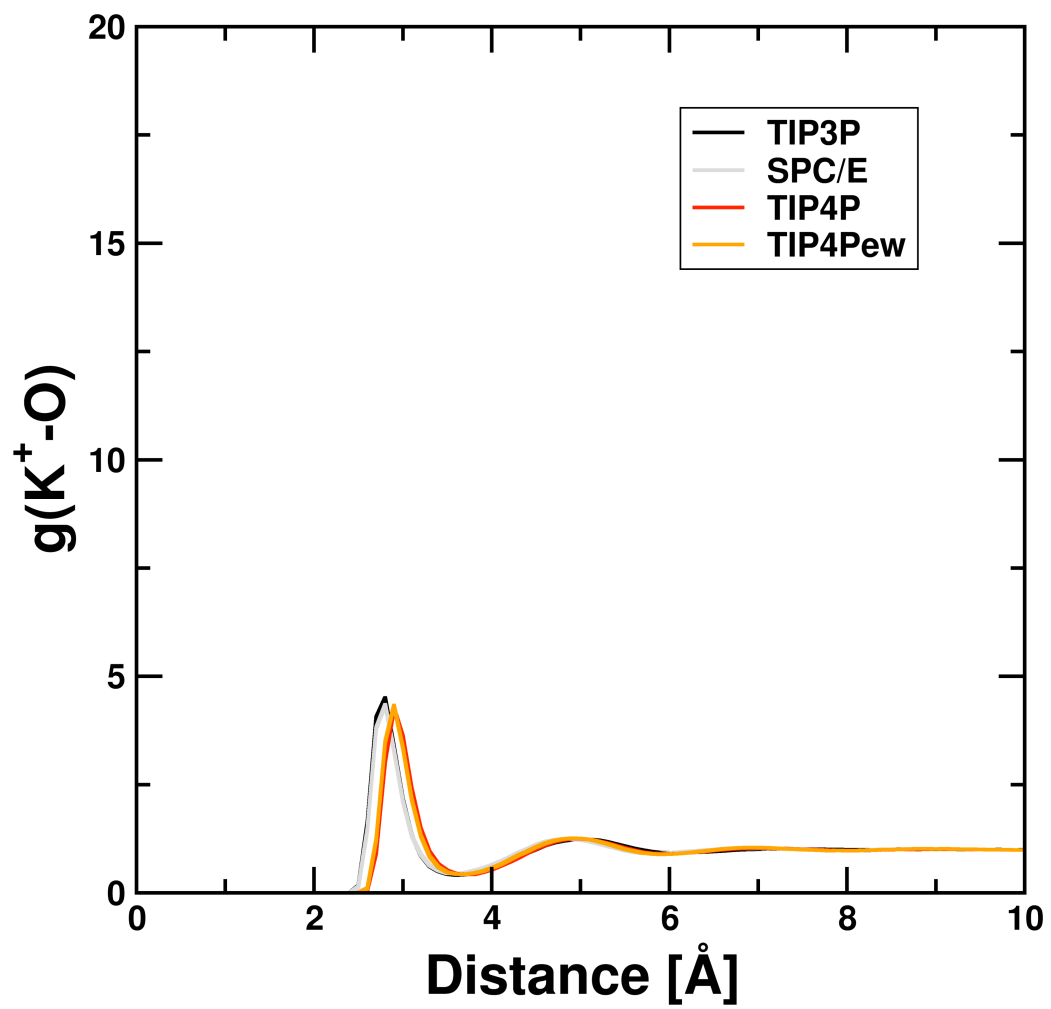

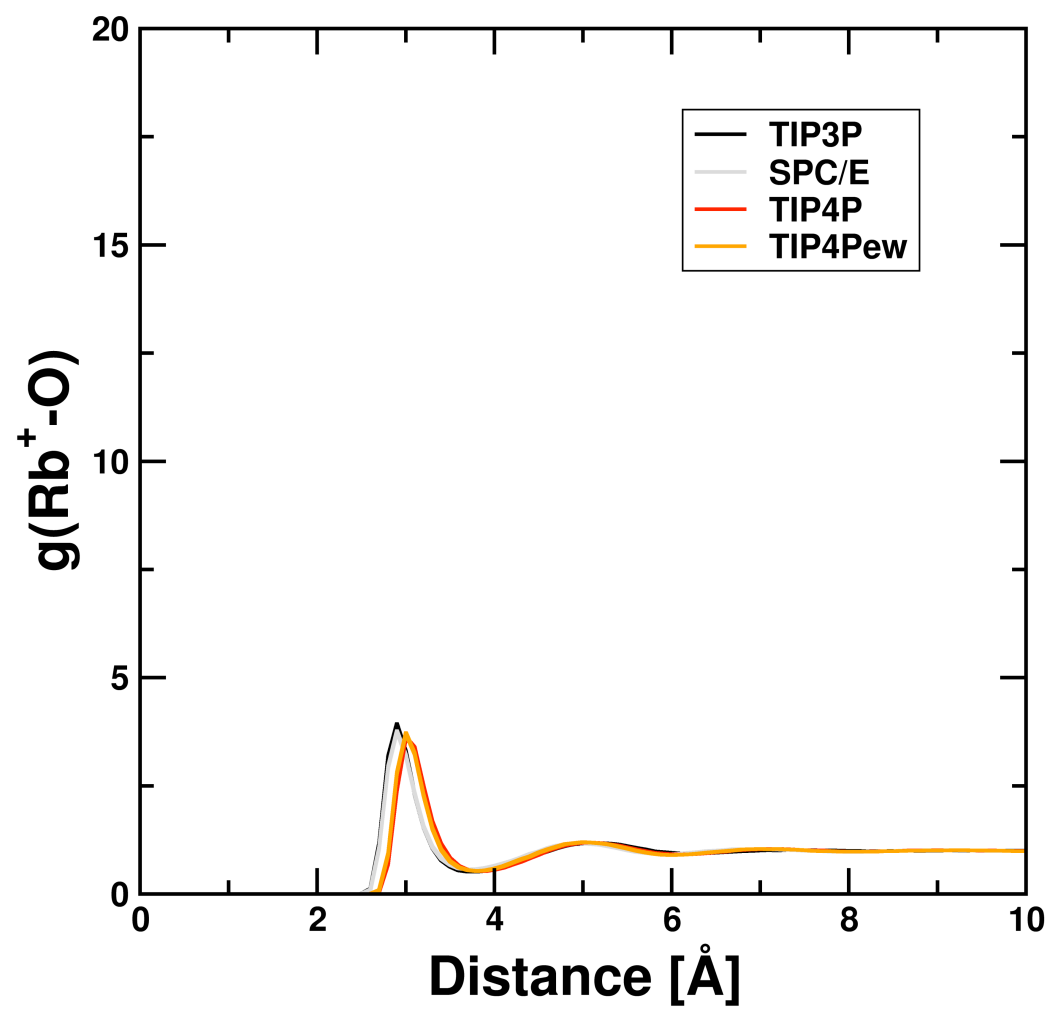

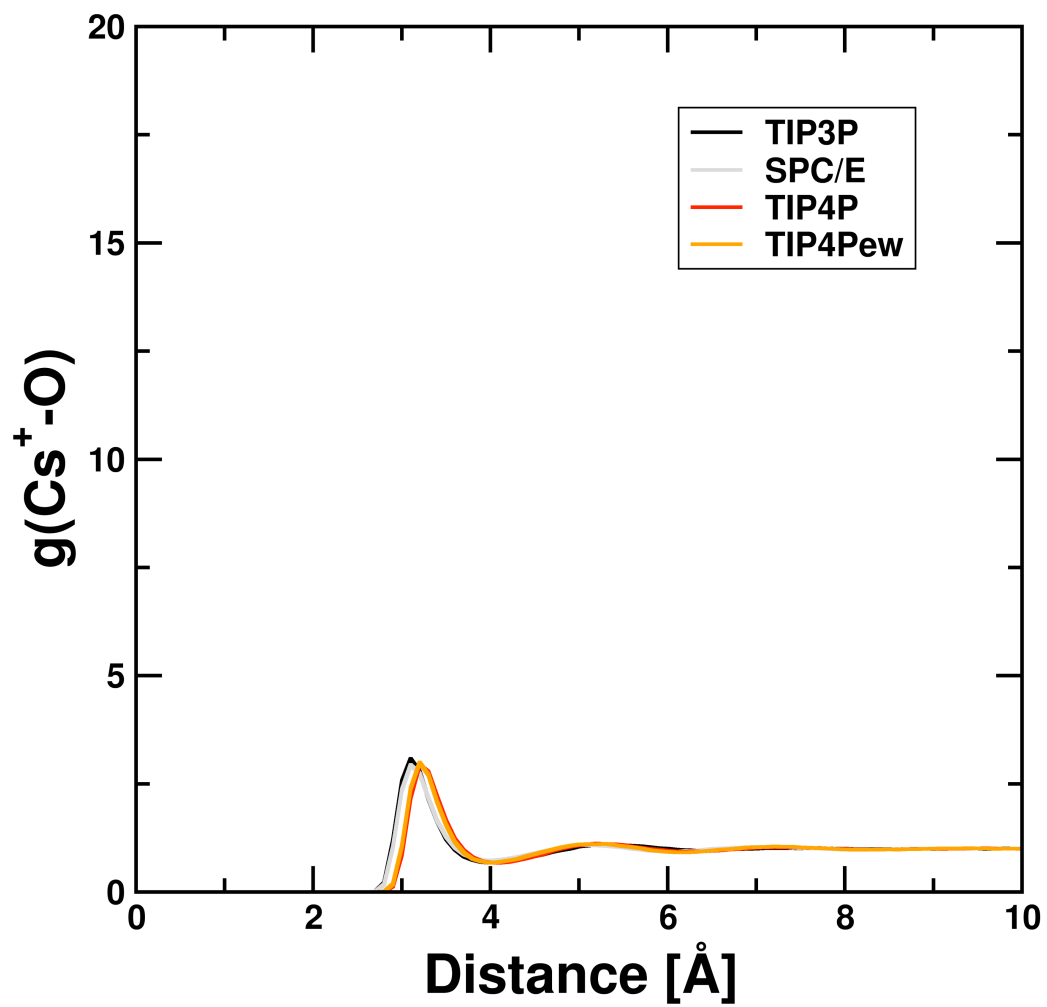

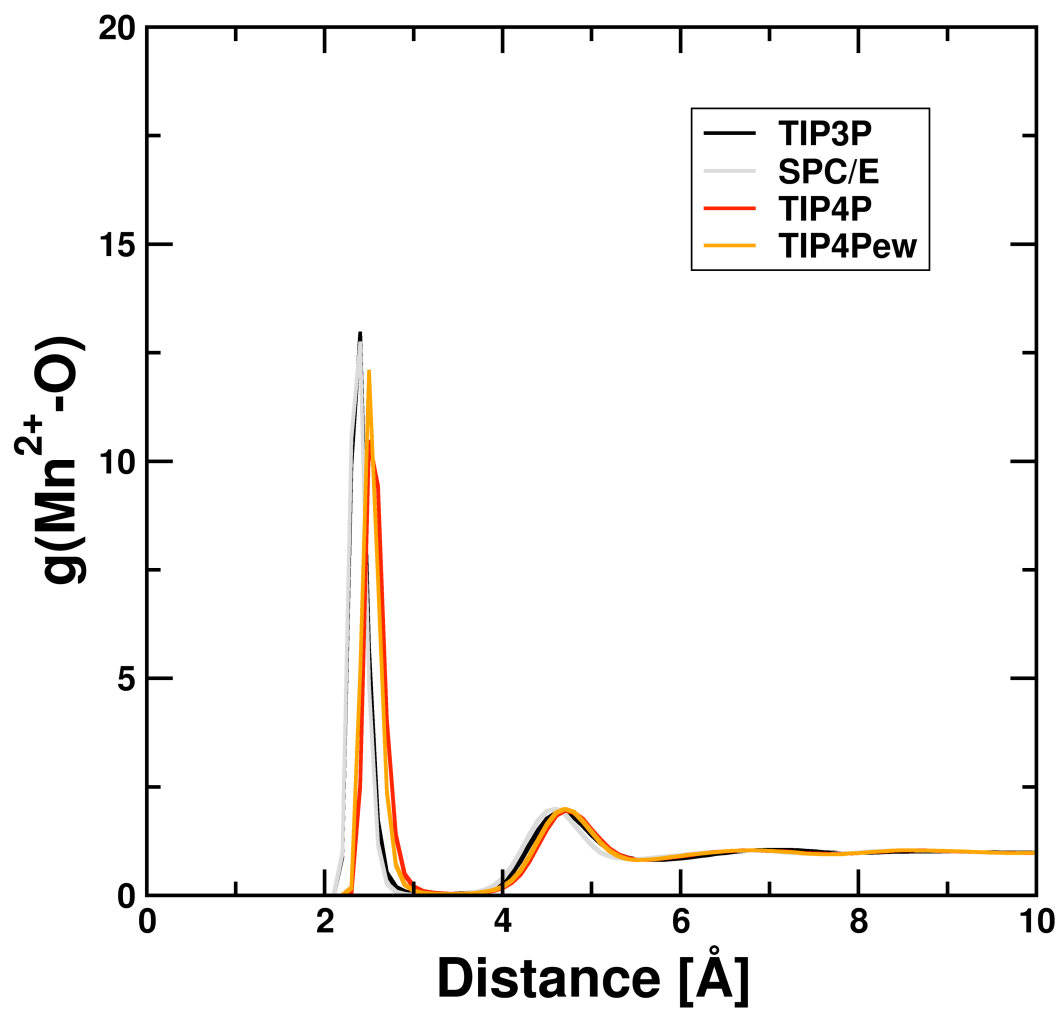

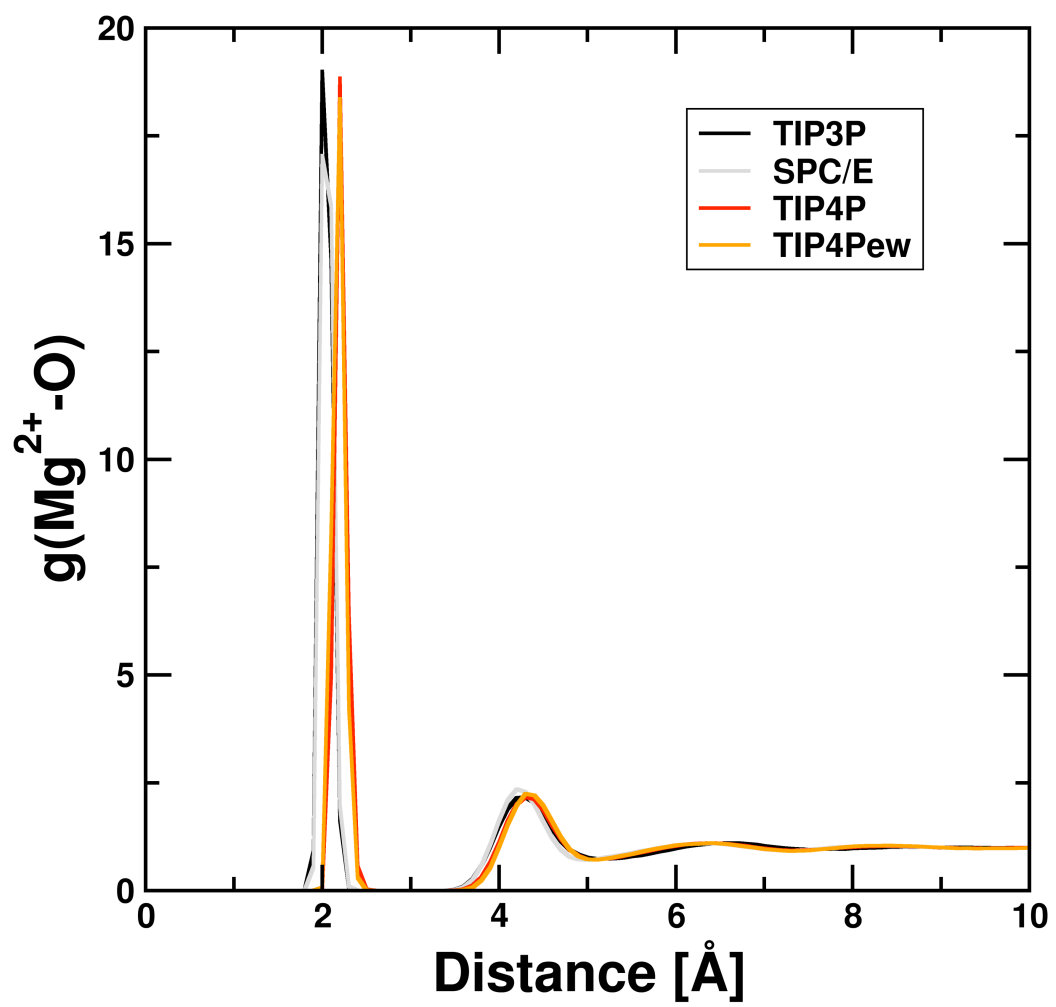

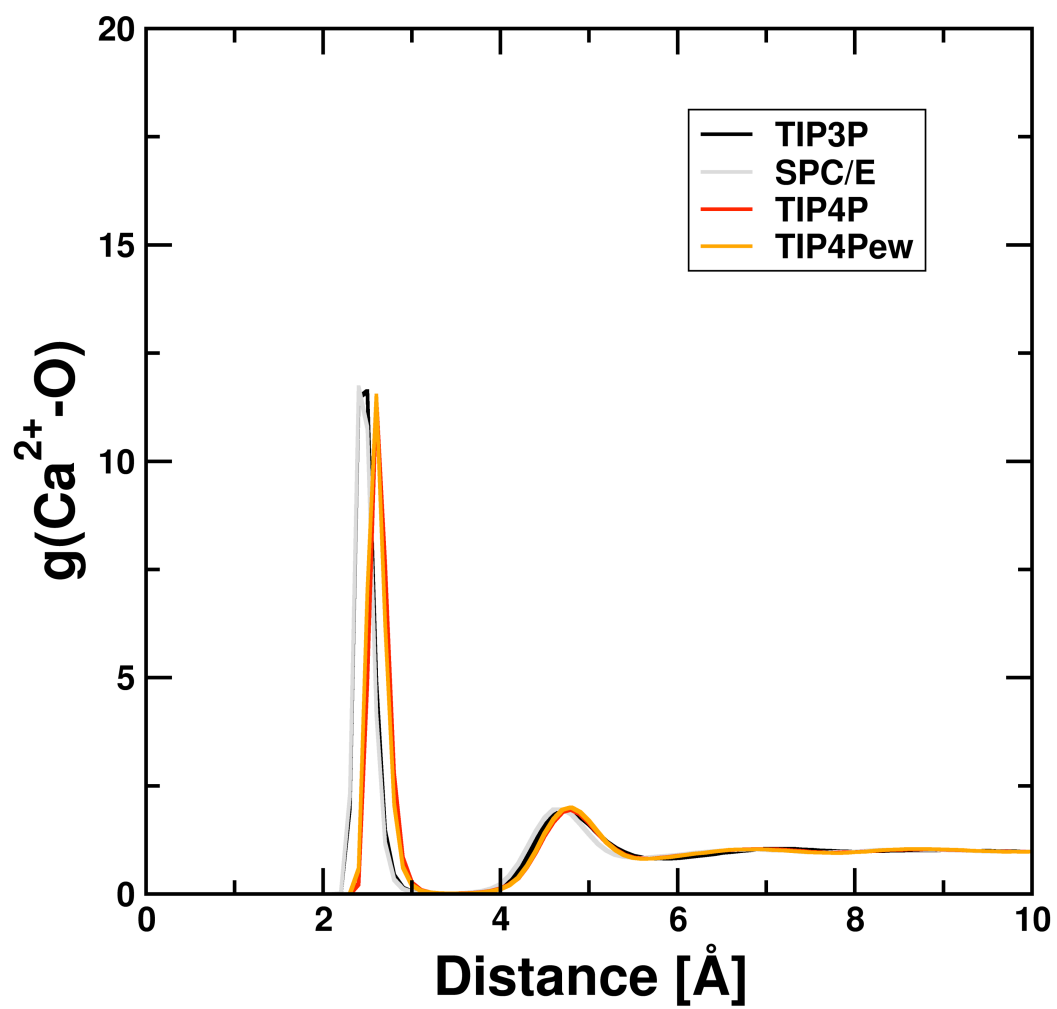



## 2. Distance-Dependent Entropy

$\text{Li}^+$

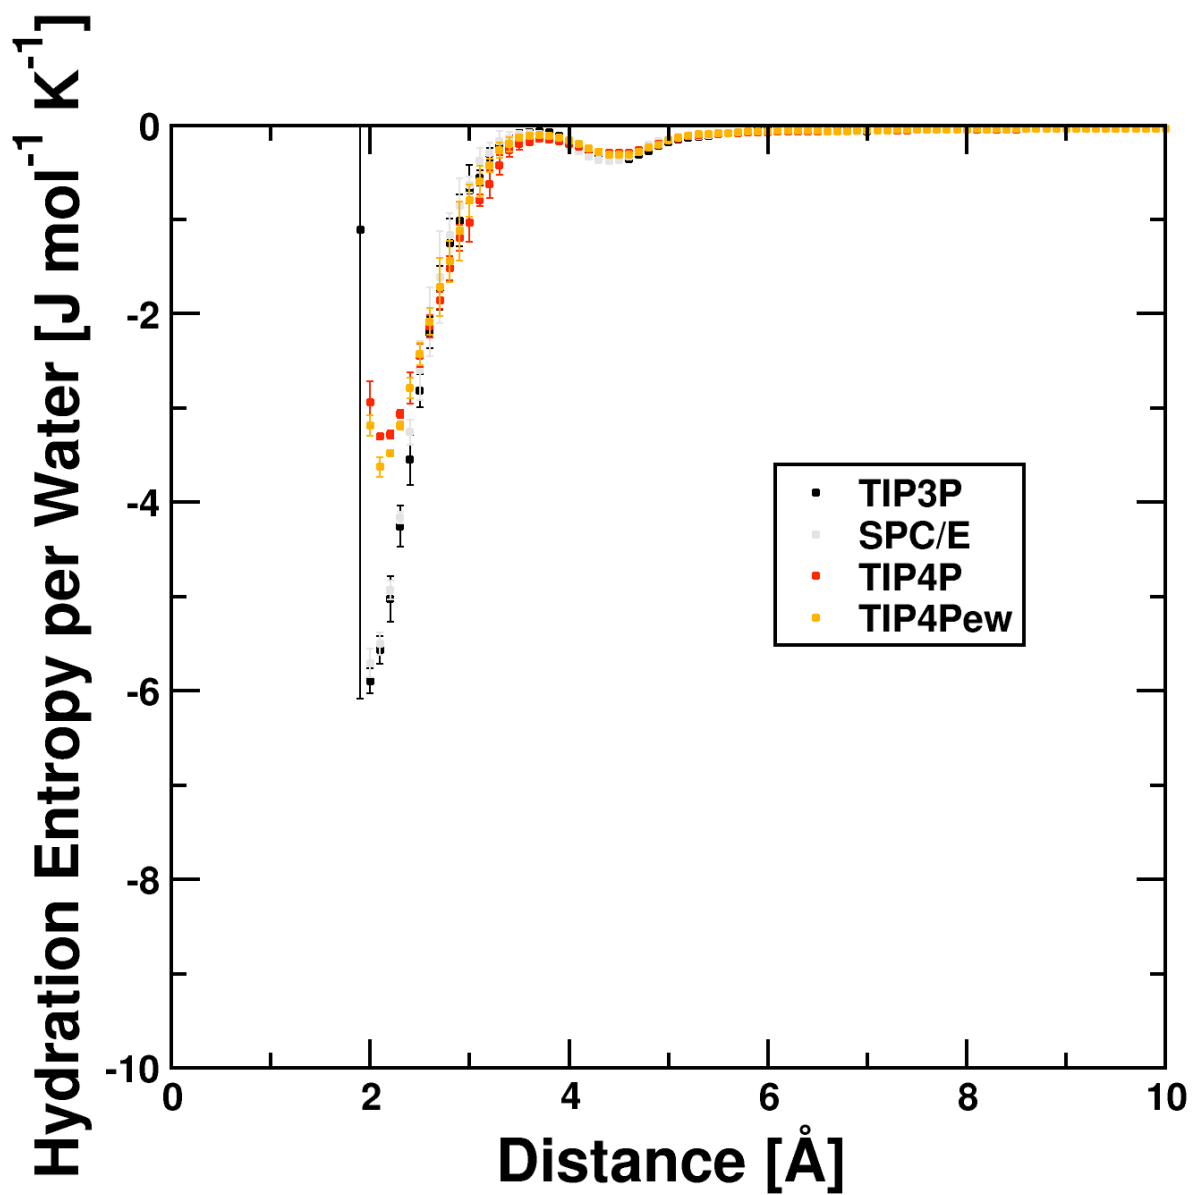

Na<sup>+</sup>

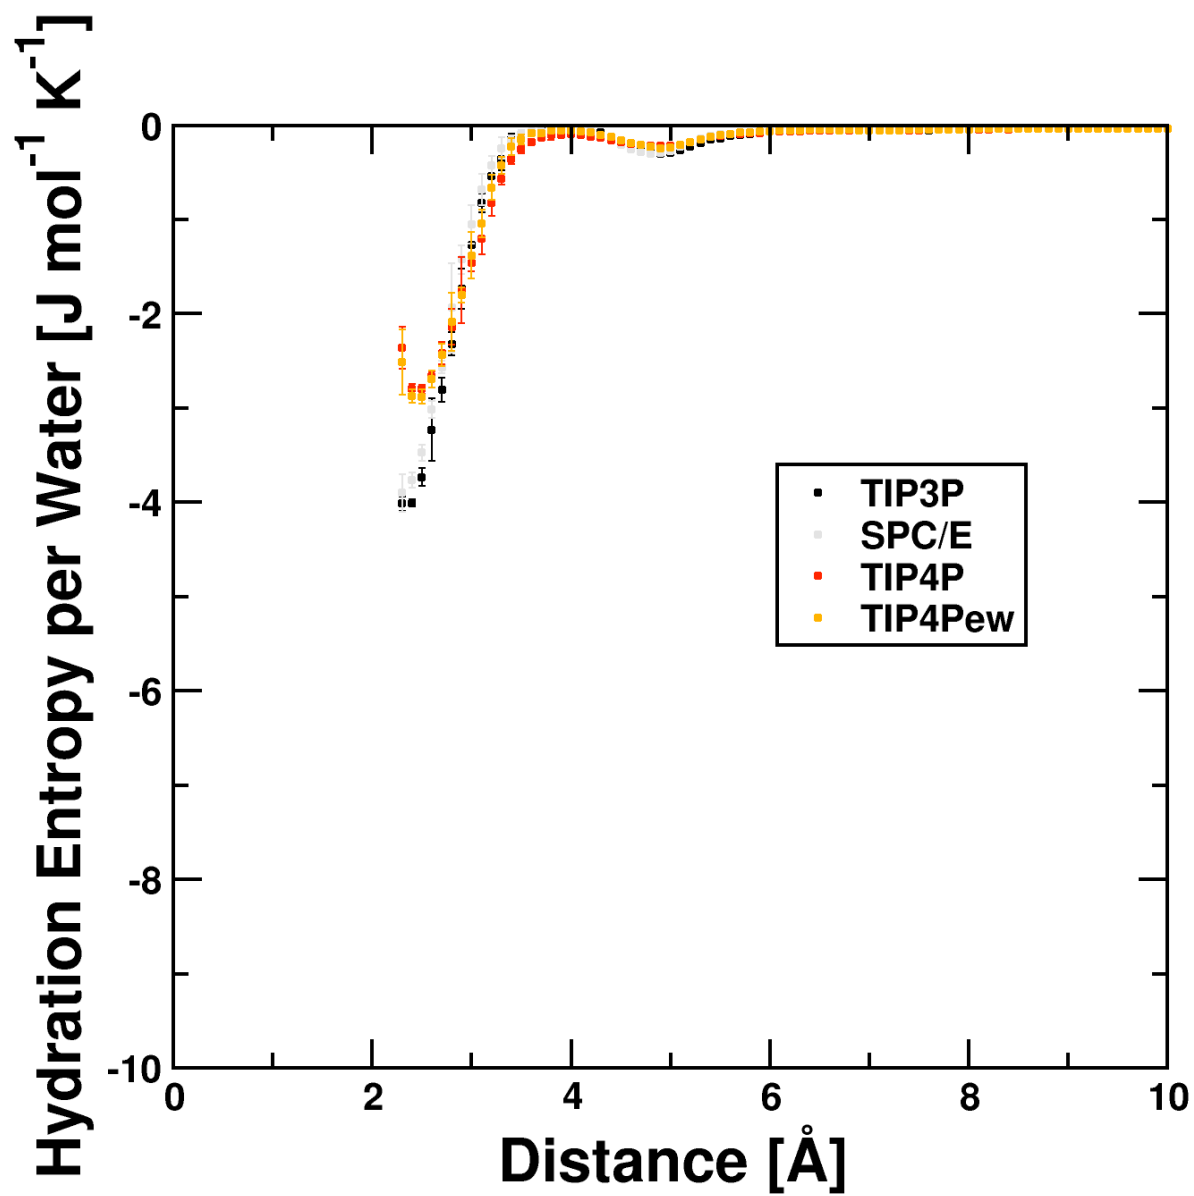

$K^+$

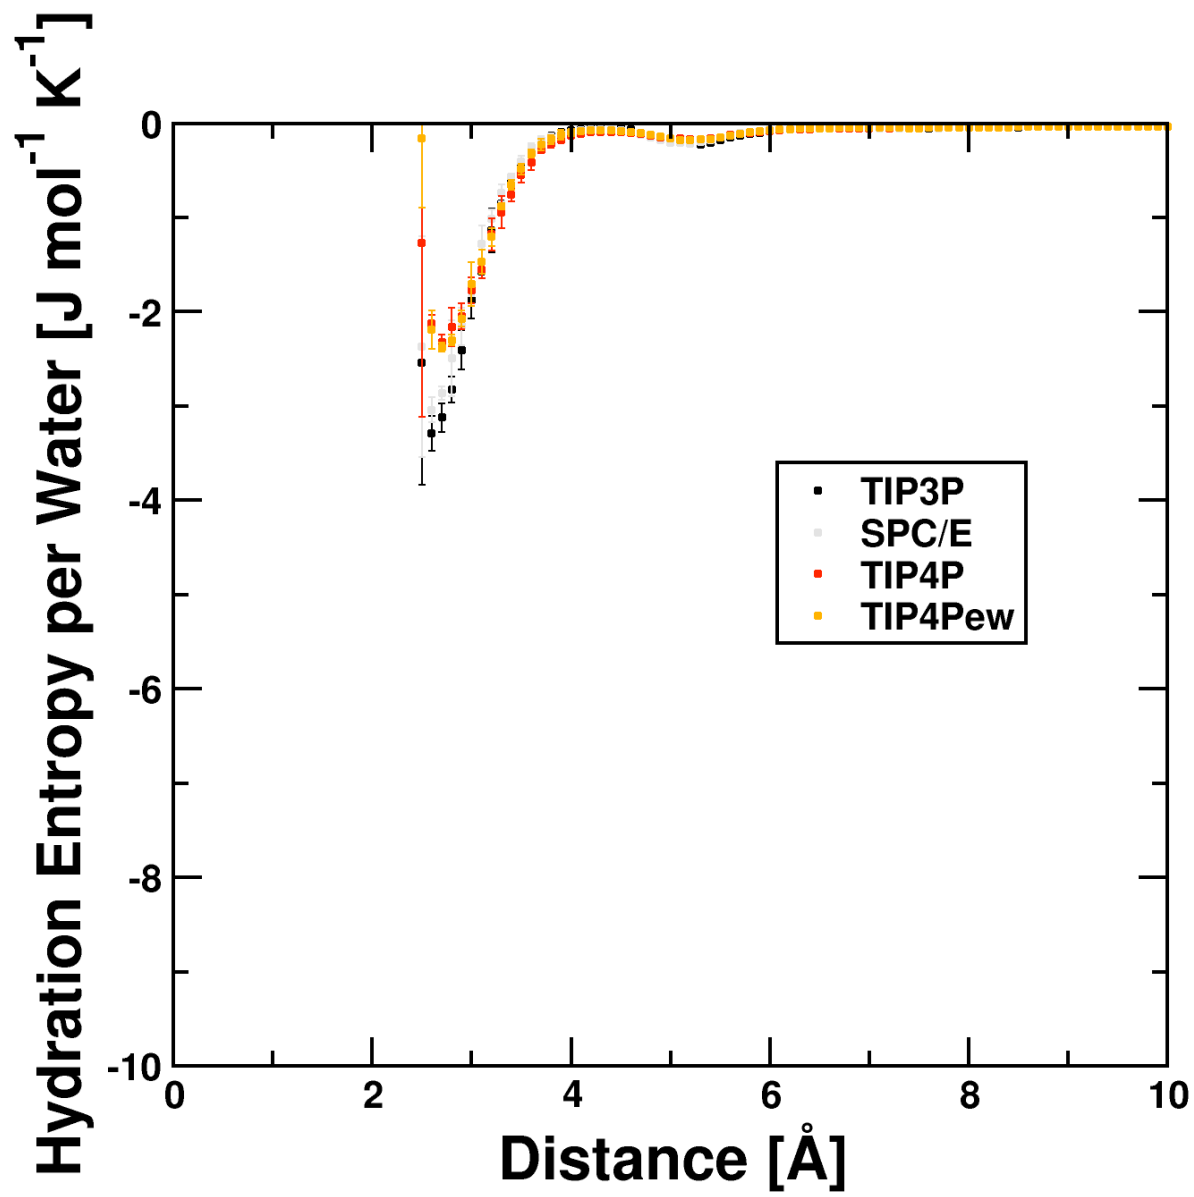

Rb<sup>+</sup>

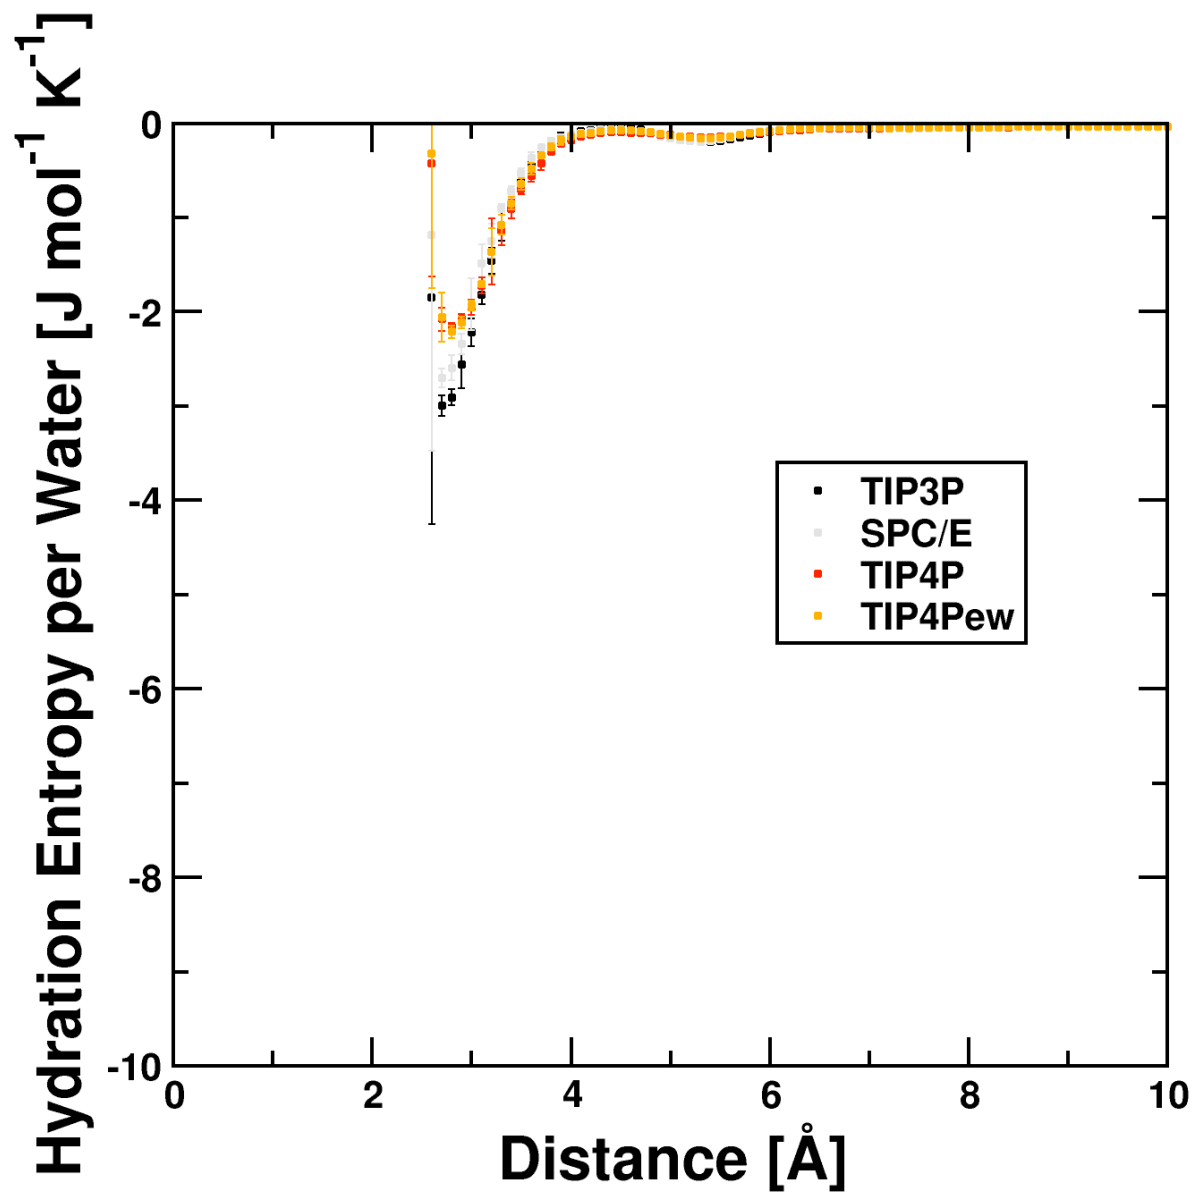

$\text{Cs}^+$

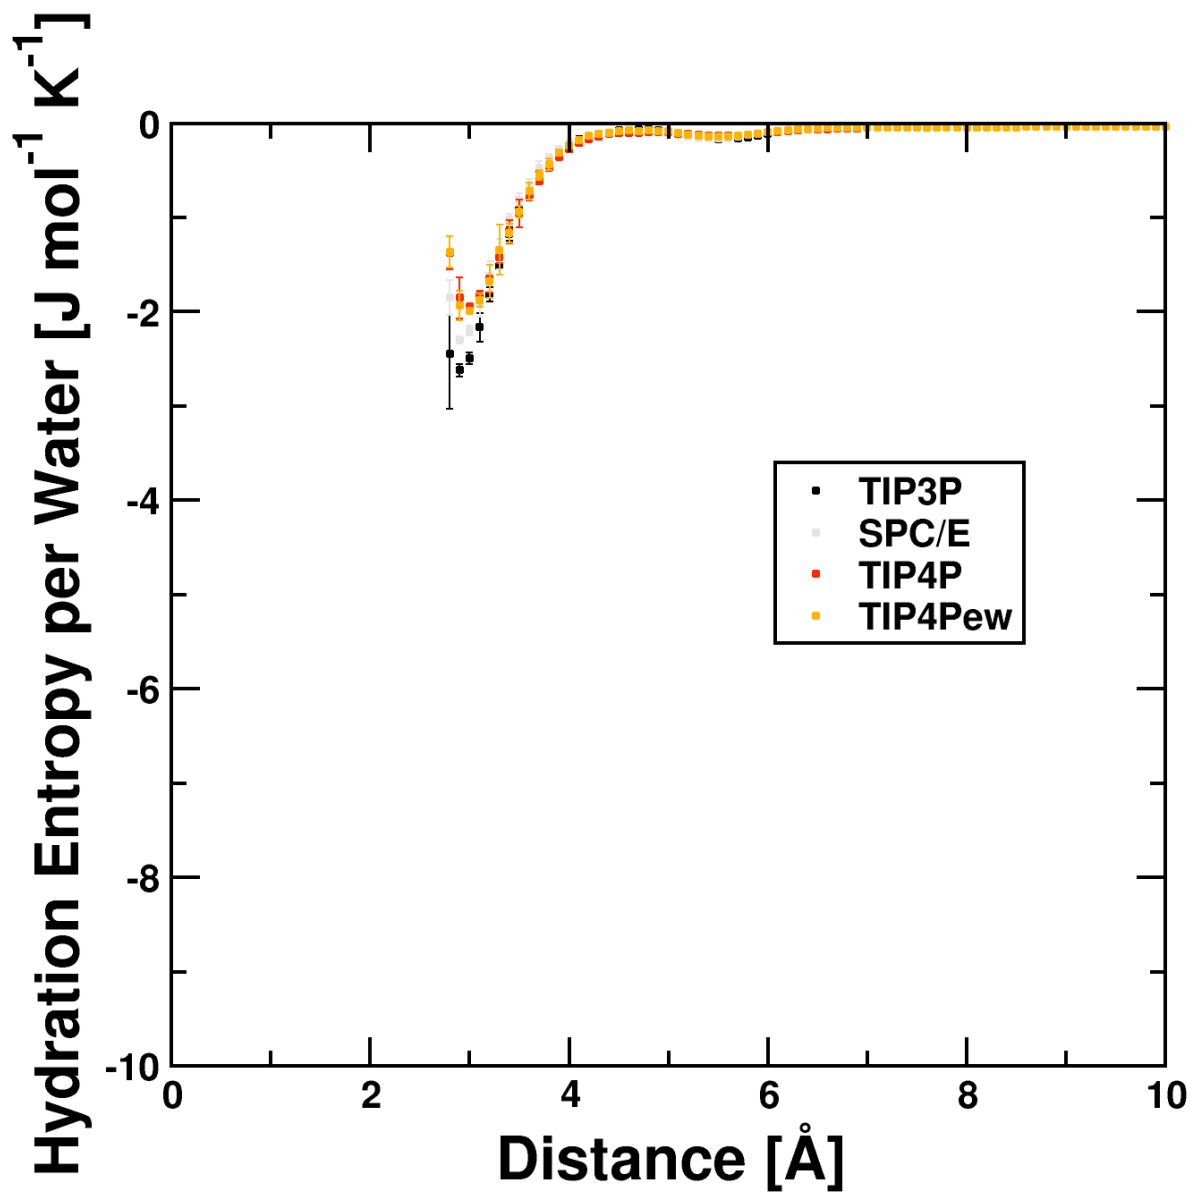

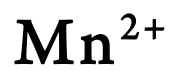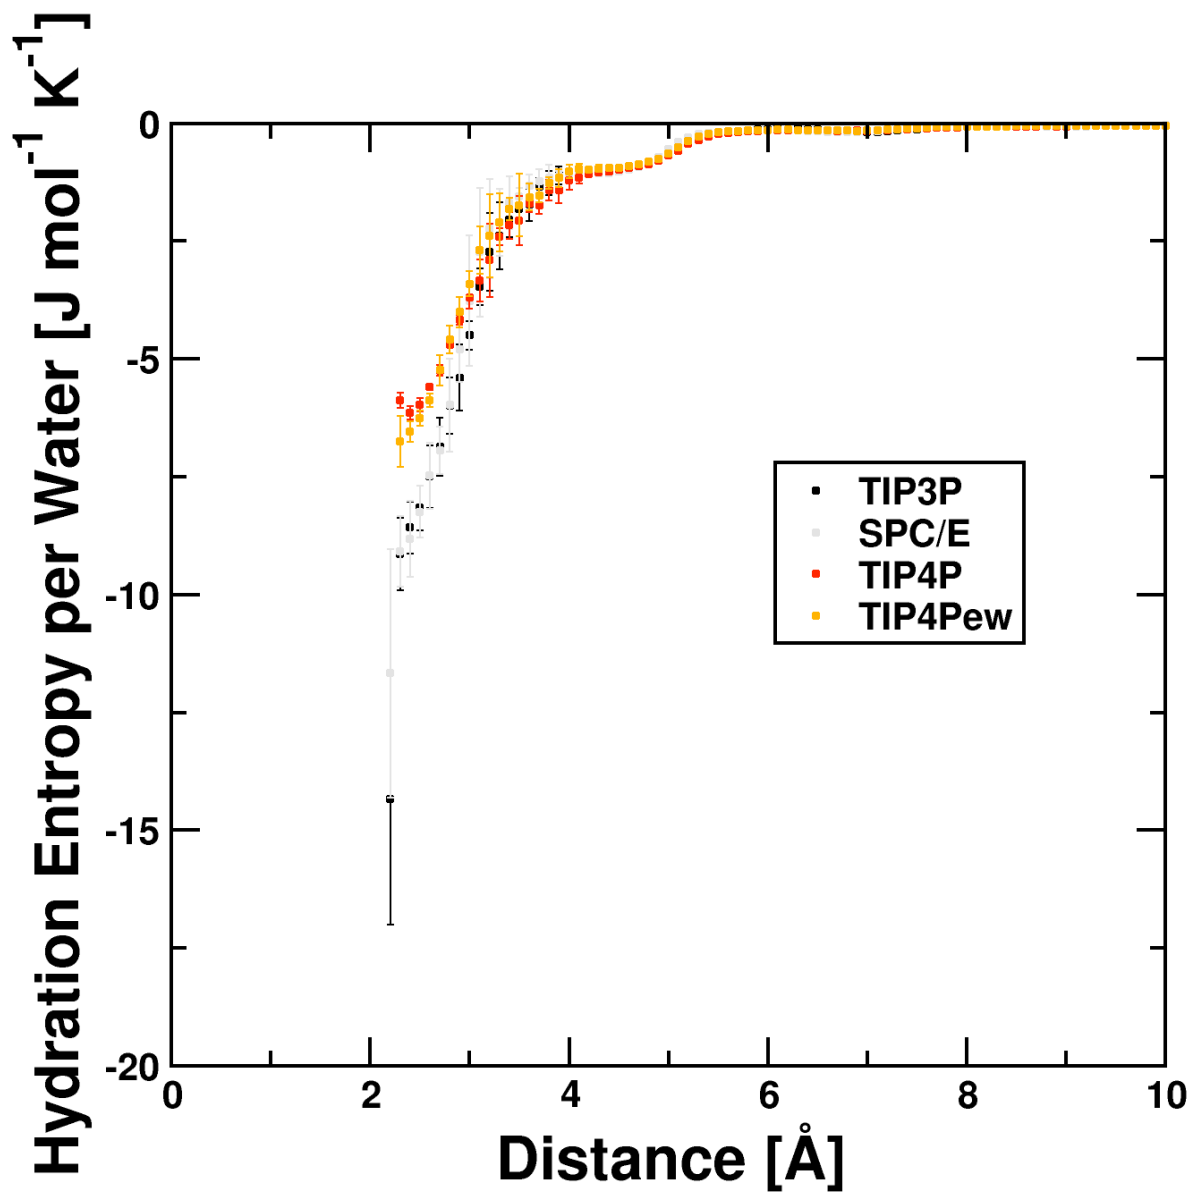

$\text{Ca}^{2+}$

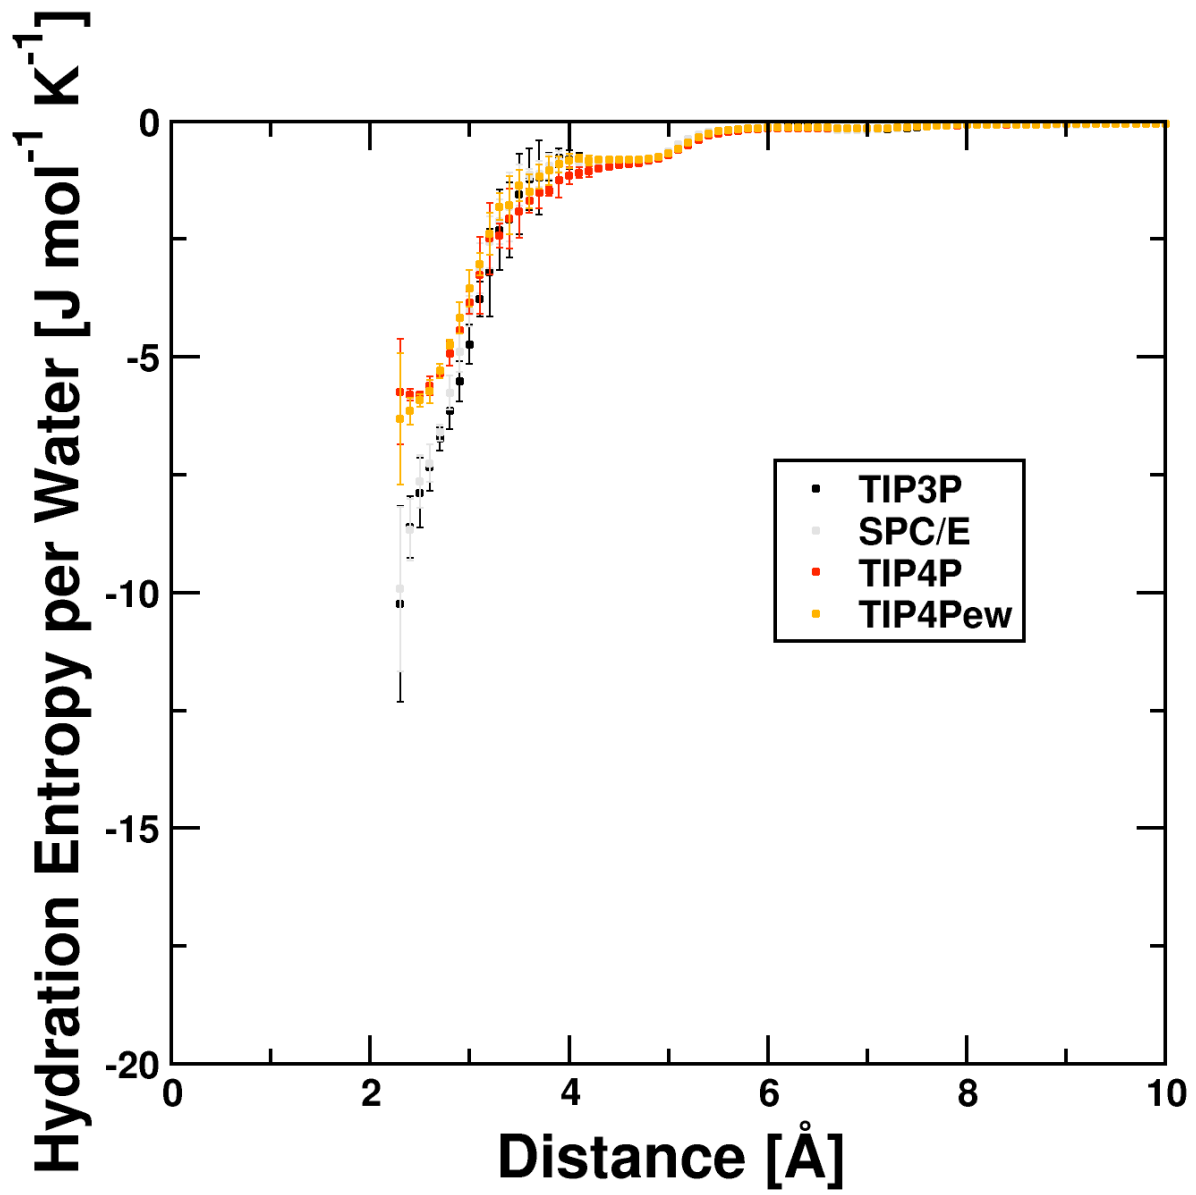

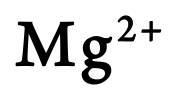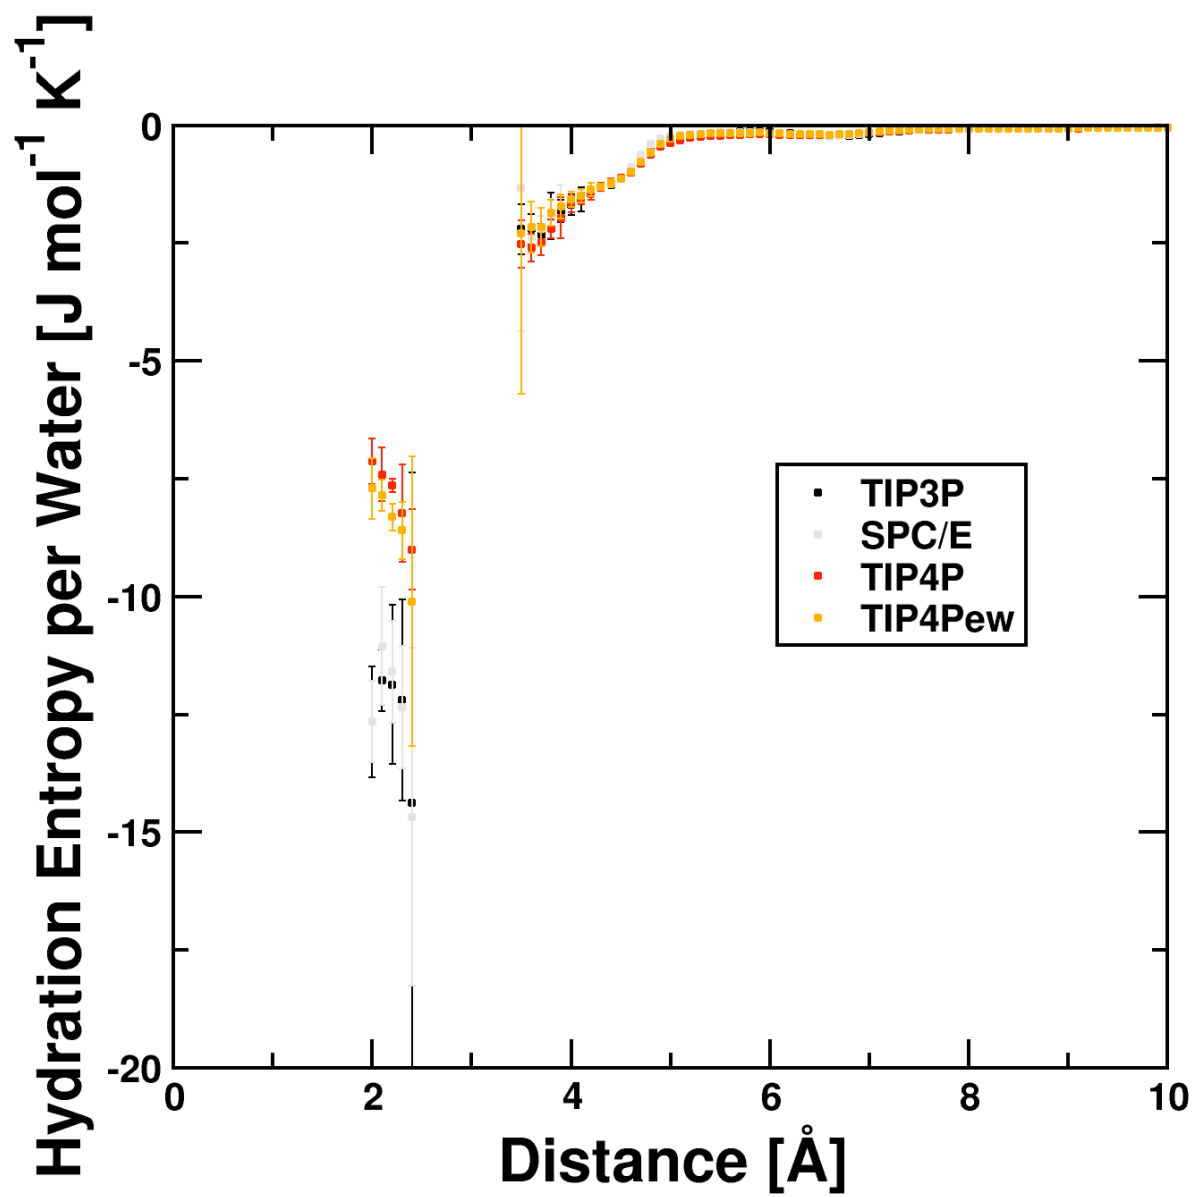

Supplement: jp311418q_si_002.pdf [file jp311418q_si_002.pdf]
